# Supplementary material
Source: HighWire-hosted journal article supplement (https://innovations.bmj.com/content/9/4/215)
Supplement: inline-supplementary-material-1 [file inline-supplementary-material-1.pdf]

## Supplementary Files

### Supplemental file 1 : Search Strategy

|                          |                                                                                                                                                                                                                                                                                                                                                                                                                                                                                                                                                                                                                        |
|--------------------------|------------------------------------------------------------------------------------------------------------------------------------------------------------------------------------------------------------------------------------------------------------------------------------------------------------------------------------------------------------------------------------------------------------------------------------------------------------------------------------------------------------------------------------------------------------------------------------------------------------------------|
| Topic                    | Telemedicine in LMICs                                                                                                                                                                                                                                                                                                                                                                                                                                                                                                                                                                                                  |
| Search Methods           | Search strategies for identifying relevant evidence synthesis reviews were developed based on the Cochrane Low and Middle Income Country Filter (citation), which are based on the World Bank classifications. Controlled vocabulary, where appropriate, and keywords for the concepts of LMICs, telemedicine, and review types were used. Searches were run PubMed (NCBI), Cochrane Library (Wiley), Embase (Ovid), Scopus (Elsevier), and the WHO Global Index Medicus. The search was not peer reviewed. The results were limited to English language articles published from 01 January 2012 through 22 July 2022. |
| PubMed (NCBI)            | 942                                                                                                                                                                                                                                                                                                                                                                                                                                                                                                                                                                                                                    |
| Embase (Ovid)            | 1202                                                                                                                                                                                                                                                                                                                                                                                                                                                                                                                                                                                                                   |
| Cochrane Library (Wiley) | 27                                                                                                                                                                                                                                                                                                                                                                                                                                                                                                                                                                                                                     |
| Scopus (Elsevier)        | 600                                                                                                                                                                                                                                                                                                                                                                                                                                                                                                                                                                                                                    |
| WHO Global Index Medicus | 58                                                                                                                                                                                                                                                                                                                                                                                                                                                                                                                                                                                                                     |
| TOTAL                    | 2829                                                                                                                                                                                                                                                                                                                                                                                                                                                                                                                                                                                                                   |
| Date Run                 | 7/22/2022                                                                                                                                                                                                                                                                                                                                                                                                                                                                                                                                                                                                              |
| Run By                   | Carrie Price, MLS<br>Albert S. Cook Library<br>Towson University<br>Towson, Maryland, USA                                                                                                                                                                                                                                                                                                                                                                                                                                                                                                                              |
| Limits                   | 1/1/2012 – 7/22/2022<br>English                                                                                                                                                                                                                                                                                                                                                                                                                                                                                                                                                                                        |
| Cite                     | Cochrane. (2022). Low and middle income country filters for MEDLINE and Embase. <a href="https://epoc.cochrane.org/lmic-filters">https://epoc.cochrane.org/lmic-filters</a>                                                                                                                                                                                                                                                                                                                                                                                                                                            |

### PubMed (NCBI)

(afghanistan[MeSH] OR albania[MeSH] OR algeria[MeSH] OR american samoa[MeSH] OR angola[MeSH] OR antigua and barbuda[MeSH] OR argentina[MeSH] OR armenia[MeSH] OR aruba[MeSH] OR azerbaijan[MeSH] OR bahrain[MeSH] OR bangladesh[MeSH] OR barbados[MeSH] OR republic of belarus[MeSH] OR belize[MeSH] OR benin[MeSH] OR bhutan[MeSH] OR bolivia[MeSH] OR bosnia and herzegovina[MeSH] OR botswana[MeSH] OR brazil[MeSH] OR bulgaria[MeSH] OR burkina faso[MeSH] OR burundi[MeSH] OR cabo verde[MeSH] OR cambodia[MeSH] OR cameroon[MeSH] OR central african republic[MeSH] OR chad[MeSH] OR chile[MeSH] OR china[MeSH] OR colombia[MeSH] OR comoros[MeSH] OR democratic republic of the congo[MeSH] OR congo[MeSH] OR costa rica[MeSH] OR cote d'ivoire[MeSH] OR croatia[MeSH] OR cuba[MeSH] OR cyprus[MeSH] OR czech republic[MeSH] OR djibouti[MeSH] OR dominica[MeSH] OR dominican republic[MeSH] OR ecuador[MeSH] OR egypt[MeSH] OR el salvador[MeSH] OR equatorial guinea[MeSH] OR eritrea[MeSH] OR estonia[MeSH] OR swaziland[MeSH] OR ethiopia[MeSH] OR fiji[MeSH] OR

gabon[MeSH] OR gambia[MeSH] OR "Georgia (Republic)"[Mesh] OR ghana[MeSH] OR gibraltar[MeSH] OR greece[MeSH] OR grenada[MeSH] OR guam[MeSH] OR guatemala[MeSH] OR guinea[MeSH] OR guinea bissau[MeSH] OR guyana[MeSH] OR haiti[MeSH] OR honduras[MeSH] OR hungary[MeSH] OR india[MeSH] OR indonesia[MeSH] OR iran[MeSH] OR iraq[MeSH] OR jamaica[MeSH] OR jordan[MeSH] OR kazakhstan[MeSH] OR kenya[MeSH] OR democratic people's republic of korea[MeSH] OR republic of korea[MeSH] OR kosovo[MeSH] OR kyrgyzstan[MeSH] OR laos[MeSH] OR latvia[MeSH] OR lebanon[MeSH] OR lesotho[MeSH] OR liberia[MeSH] OR libya[MeSH] OR lithuania[MeSH] OR macau[MeSH] OR republic of north macedonia[MeSH] OR madagascar[MeSH] OR malawi[MeSH] OR malaysia[MeSH] OR indian ocean islands[MeSH] OR mali[MeSH] OR malta[MeSH] OR micronesia[MeSH] OR palau[MeSH] OR mauritania[MeSH] OR mauritius[MeSH] OR mexico[MeSH] OR moldova[MeSH] OR mongolia[MeSH] OR montenegro[MeSH] OR morocco[MeSH] OR mozambique[MeSH] OR myanmar[MeSH] OR namibia[MeSH] OR nepal[MeSH] OR netherlands antilles[MeSH] OR nicaragua[MeSH] OR niger[MeSH] OR nigeria[MeSH] OR oman[MeSH] OR pakistan[MeSH] OR panama[MeSH] OR papua new guinea[MeSH] OR paraguay[MeSH] OR peru[MeSH] OR philippines[MeSH] OR poland[MeSH] OR portugal[MeSH] OR puerto rico[MeSH] OR romania[MeSH] OR russia[MeSH] OR rwanda[MeSH] OR samoa[MeSH] OR sao tome and principe[MeSH] OR saudi arabia[MeSH] OR senegal[MeSH] OR serbia[MeSH] OR seychelles[MeSH] OR sierra leone[MeSH] OR slovakia[MeSH] OR slovenia[MeSH] OR melanesia[MeSH] OR somalia[MeSH] OR south africa[MeSH] OR south sudan[MeSH] OR sri lanka[MeSH] OR saint kitts and nevis[MeSH] OR saint lucia[MeSH] OR saint vincent and the grenadines[MeSH] OR sudan[MeSH] OR suriname[MeSH] OR syria[MeSH] OR tajikistan[MeSH] OR tanzania[MeSH] OR thailand[MeSH] OR timor leste[MeSH] OR togo[MeSH] OR tonga[MeSH] OR trinidad and tobago[MeSH] OR tunisia[MeSH] OR turkey[MeSH] OR turkmenistan[MeSH] OR uganda[MeSH] OR ukraine[MeSH] OR uruguay[MeSH] OR uzbekistan[MeSH] OR vanuatu[MeSH] OR venezuela[MeSH] OR vietnam[MeSH] OR middle east[MeSH] OR yemen[MeSH] OR yugoslavia[MeSH] OR zambia[MeSH] OR zimbabwe[MeSH] OR africa south of the sahara[MeSH] OR africa, central[MeSH] OR africa, northern[MeSH] OR africa, southern[MeSH] OR africa, eastern[MeSH] OR africa, western[MeSH] OR west indies[MeSH] OR indian ocean islands[MeSH] OR caribbean region[MeSH] OR central america[MeSH] OR latin america[MeSH] OR south america[MeSH] OR asia, central[MeSH] OR asia, northern[MeSH] OR asia, southeastern[MeSH] OR asia, western[MeSH] OR europe, eastern[MeSH] OR developing countries[MeSH] OR afghanistan[Text Word] OR albania[Text Word] OR algeria[Text Word] OR american samoa[Text Word] OR angola[Text Word] OR antigua[Text Word] OR barbuda[Text Word] OR argentina[Text Word] OR armenia[Text Word] OR armenian[Text Word] OR aruba[Text Word] OR azerbaijan[Text Word] OR bahrain[Text Word] OR bangladesh[Text Word] OR barbados[Text Word] OR belarus[Text Word] OR byelarus[Text Word] OR belorussia[Text Word] OR byelorussian[Text Word] OR belize[Text Word] OR british honduras[Text Word] OR benin[Text Word] OR dahomey[Text Word] OR bhutan[Text Word] OR bolivia[Text Word] OR bosnia[Text Word] OR herzegovina[Text Word] OR botswana[Text Word] OR bechuanaland[Text Word] OR brazil[Text Word] OR brasil[Text Word] OR bulgaria[Text Word] OR burkina faso[Text Word] OR burkina fasso[Text Word] OR upper volta[Text Word] OR burundi[Text Word] OR urundi[Text Word] OR cabo verde[Text Word] OR cape verde[Text Word] OR cambodia[Text Word] OR kampuchea[Text Word] OR khmer republic[Text Word] OR cameroon[Text Word] OR cameron[Text Word] OR cameroun[Text Word] OR central african republic[Text Word] OR ubangi shari[Text Word] OR chad[Text Word] OR chile[Text Word] OR china[Text Word] OR colombia[Text Word] OR comoros[Text Word] OR comoro islands[Text Word] OR mayotte[Text Word] OR congo[Text Word] OR zaire[Text Word] OR costa rica[Text Word] OR cote d'ivoire[Text Word] OR cote d'ivoire[Text Word] OR cote divoire[Text Word] OR ivory coast[Text Word] OR croatia[Text Word] OR cuba[Text Word] OR cyprus[Text Word] OR czech republic[Text Word] OR czechoslovakia[Text Word] OR djibouti[Text Word] OR french somaliland[Text Word] OR

dominica[Text Word] OR dominican republic[Text Word] OR ecuador[Text Word] OR egypt[Text Word] OR united arab republic[Text Word] OR el salvador[Text Word] OR equatorial guinea[Text Word] OR spanish guinea[Text Word] OR eritrea[Text Word] OR estonia[Text Word] OR eswatini[Text Word] OR swaziland[Text Word] OR ethiopia[Text Word] OR fiji[Text Word] OR gabon[Text Word] OR gabonese republic[Text Word] OR gambia[Text Word] OR georgia[Text Word] OR georgian[Text Word] OR ghana[Text Word] OR gold coast[Text Word] OR gibraltar[Text Word] OR greece[Text Word] OR grenada[Text Word] OR guam[Text Word] OR guatemala[Text Word] OR guinea[Text Word] OR guyana[Text Word] OR guiana[Text Word] OR haiti[Text Word] OR hispaniola[Text Word] OR honduras[Text Word] OR hungary[Text Word] OR india[Text Word] OR indonesia[Text Word] OR timor[Text Word] OR iran[Text Word] OR iraq[Text Word] OR isle of man[Text Word] OR jamaica[Text Word] OR jordan[Text Word] OR kazakhstan[Text Word] OR kazakh[Text Word] OR kenya[Text Word] OR korea[Text Word] OR kosovo[Text Word] OR kyrgyzstan[Text Word] OR kirghizia[Text Word] OR kirgizstan[Text Word] OR kyrgyz republic[Text Word] OR kirghiz[Text Word] OR laos[Text Word] OR lao pdr[Text Word] OR lao people's democratic republic[Text Word] OR latvia[Text Word] OR lebanon[Text Word] OR lesotho[Text Word] OR basutoland[Text Word] OR liberia[Text Word] OR libya[Text Word] OR libyan arab jamahiriya[Text Word] OR lithuania[Text Word] OR macau[Text Word] OR macao[Text Word] OR macedonia[Text Word] OR madagascar[Text Word] OR malagasy republic[Text Word] OR malawi[Text Word] OR nyasaland[Text Word] OR malaysia[Text Word] OR maldives[Text Word] OR indian ocean[Text Word] OR mali[Text Word] OR malta[Text Word] OR micronesia[Text Word] OR kiribati[Text Word] OR marshall islands[Text Word] OR nauru[Text Word] OR northern mariana islands[Text Word] OR palau[Text Word] OR tuvalu[Text Word] OR mauritania[Text Word] OR mauritius[Text Word] OR mexico[Text Word] OR moldova[Text Word] OR moldovian[Text Word] OR mongolia[Text Word] OR montenegro[Text Word] OR morocco[Text Word] OR ifni[Text Word] OR mozambique[Text Word] OR portuguese east africa[Text Word] OR myanmar[Text Word] OR burma[Text Word] OR namibia[Text Word] OR nepal[Text Word] OR netherlands antilles[Text Word] OR nicaragua[Text Word] OR niger[Text Word] OR nigeria[Text Word] OR oman[Text Word] OR muscat[Text Word] OR pakistan[Text Word] OR panama[Text Word] OR papua new guinea[Text Word] OR paraguay[Text Word] OR peru[Text Word] OR philippines[Text Word] OR philipines[Text Word] OR phillipines[Text Word] OR philippines[Text Word] OR poland[Text Word] OR polish people's republic[Text Word] OR portugal[Text Word] OR portuguese republic[Text Word] OR puerto rico[Text Word] OR romania[Text Word] OR russia[Text Word] OR russian federation[Text Word] OR ussr[Text Word] OR soviet union[Text Word] OR union of soviet socialist republics[Text Word] OR rwanda[Text Word] OR ruanda[Text Word] OR samoa[Text Word] OR pacific islands[Text Word] OR polynesia[Text Word] OR samoan islands[Text Word] OR sao tome and principe[Text Word] OR saudi arabia[Text Word] OR senegal[Text Word] OR serbia[Text Word] OR seychelles[Text Word] OR sierra leone[Text Word] OR slovakia[Text Word] OR slovak republic[Text Word] OR slovenia[Text Word] OR melanesia[Text Word] OR solomon island[Text Word] OR solomon islands[Text Word] OR norfolk island[Text Word] OR somalia[Text Word] OR south africa[Text Word] OR south sudan[Text Word] OR sri lanka[Text Word] OR ceylon[Text Word] OR saint kitts and nevis[Text Word] OR st kitts and nevis[Text Word] OR saint lucia[Text Word] OR st lucia[Text Word] OR saint vincent[Text Word] OR st vincent[Text Word] OR grenadines[Text Word] OR sudan[Text Word] OR suriname[Text Word] OR surinam[Text Word] OR syria[Text Word] OR syrian arab republic[Text Word] OR tajikistan[Text Word] OR tadjikistan[Text Word] OR tadjhikistan[Text Word] OR tadjhik[Text Word] OR tanzania[Text Word] OR tanganyika[Text Word] OR thailand[Text Word] OR siam[Text Word] OR timor leste[Text Word] OR east timor[Text Word] OR togo[Text Word] OR togolese republic[Text Word] OR tonga[Text Word] OR trinidad[Text Word] OR tobago[Text Word] OR tunisia[Text Word] OR turkey[Text Word] OR turkmenistan[Text Word] OR turkmen[Text Word] OR uganda[Text Word] OR ukraine[Text Word] OR uruguay[Text Word] OR uzbekistan[Text Word] OR

uzbek[Text Word] OR vanuatu[Text Word] OR new hebrides[Text Word] OR venezuela[Text Word] OR vietnam[Text Word] OR viet nam[Text Word] OR middle east[Text Word] OR west bank[Text Word] OR gaza[Text Word] OR palestine[Text Word] OR yemen[Text Word] OR yugoslavia[Text Word] OR zambia[Text Word] OR zimbabwe[Text Word] OR northern rhodesia[Text Word] OR global south[Text Word] OR africa south of the sahara[Text Word] OR sub saharan africa[Text Word] OR subsaharan africa[Text Word] OR central africa[Text Word] OR north africa[Text Word] OR northern africa[Text Word] OR magreb[Text Word] OR maghrib[Text Word] OR sahara[Text Word] OR southern africa[Text Word] OR east africa[Text Word] OR eastern africa[Text Word] OR west africa[Text Word] OR western africa[Text Word] OR west indies[Text Word] OR indian ocean islands[Text Word] OR caribbean[Text Word] OR central america[Text Word] OR latin america[Text Word] OR south america[Text Word] OR central asia[Text Word] OR north asia[Text Word] OR northern asia[Text Word] OR southeastern asia[Text Word] OR south eastern asia[Text Word] OR southeast asia[Text Word] OR south east asia[Text Word] OR western asia[Text Word] OR east europe[Text Word] OR eastern europe[Text Word] OR developing country[Text Word] OR developing countries[Text Word] OR developing nation[Text Word] OR developing nations[Text Word] OR developing population[Text Word] OR developing populations[Text Word] OR developing world[Text Word] OR less developed country[Text Word] OR less developed countries[Text Word] OR less developed nation[Text Word] OR less developed nations[Text Word] OR less developed world[Text Word] OR lesser developed countries[Text Word] OR lesser developed nations[Text Word] OR under developed country[Text Word] OR under developed countries[Text Word] OR under developed nations[Text Word] OR under developed world[Text Word] OR underdeveloped country[Text Word] OR underdeveloped countries[Text Word] OR underdeveloped nation[Text Word] OR underdeveloped nations[Text Word] OR underdeveloped population[Text Word] OR underdeveloped populations[Text Word] OR underdeveloped world[Text Word] OR middle income country[Text Word] OR middle income countries[Text Word] OR middle income nation[Text Word] OR middle income nations[Text Word] OR middle income population[Text Word] OR middle income populations[Text Word] OR low income country[Text Word] OR low income countries[Text Word] OR low income nation[Text Word] OR low income nations[Text Word] OR low income population[Text Word] OR low income populations[Text Word] OR lower income country[Text Word] OR lower income countries[Text Word] OR lower income nations[Text Word] OR lower income population[Text Word] OR lower income populations[Text Word] OR underserved countries[Text Word] OR underserved nations[Text Word] OR underserved population[Text Word] OR underserved populations[Text Word] OR under served population[Text Word] OR under served populations[Text Word] OR deprived countries[Text Word] OR deprived population[Text Word] OR deprived populations[Text Word] OR poor country[Text Word] OR poor countries[Text Word] OR poor nation[Text Word] OR poor nations[Text Word] OR poor population[Text Word] OR poor populations[Text Word] OR poor world[Text Word] OR poorer countries[Text Word] OR poorer nations[Text Word] OR poorer population[Text Word] OR poorer populations[Text Word] OR developing economy[Text Word] OR developing economies[Text Word] OR less developed economy[Text Word] OR less developed economies[Text Word] OR underdeveloped economies[Text Word] OR middle income economy[Text Word] OR middle income economies[Text Word] OR low income economy[Text Word] OR low income economies[Text Word] OR lower income economies[Text Word] OR low gdp[Text Word] OR low gnp[Text Word] OR low gross domestic[Text Word] OR low gross national[Text Word] OR lower gdp[Text Word] OR lower gross domestic[Text Word] OR lmic[Text Word] OR lmic[Text Word] OR third world[Text Word] OR lami country[Text Word] OR lami countries[Text Word] OR transitional country[Text Word] OR transitional countries[Text Word] OR emerging economies[Text Word] OR emerging nation[Text Word] OR emerging nations[Text Word])

AND

("telemedicine"[mesh] OR "remote consultation"[mesh] OR "telenursing"[mesh] OR "telepathology"[mesh] OR "teleradiology"[mesh] OR "telerehabilitation"[mesh] OR "eHealth"[tw] OR "esanjeevani"[tw] OR "mHealth"[tw] OR "mobile health"[tw] OR "remote consultation"[tw] OR "remote consultations"[tw] OR "tele care"[tw] OR "tele consult"[tw] OR "tele consultation"[tw] OR "tele consultations"[tw] OR "tele consults"[tw] OR "tele diagnosis"[tw] OR "tele diagnostic"[tw] OR "tele diagnostics"[tw] OR "tele health"[tw] OR "tele medicine"[tw] OR "tele monitor\*"[tw] OR "tele nursing"[tw] OR "tele pathology"[tw] OR "tele pharmacy"[tw] OR "tele radiology"[tw] OR "tele rehab"[tw] OR "tele rehabilitation"[tw] OR "telecare"[tw] OR "teleconsult"[tw] OR "teleconsultation"[tw] OR "teleconsultations"[tw] OR "teleconsults"[tw] OR "telediagnosis"[tw] OR "telediagnostic"[tw] OR "telediagnosics"[tw] OR "telehealth"[tw] OR "telemedicine"[tw] OR "telemonitor\*"[tw] OR "telenursing"[tw] OR "telepathology"[tw] OR "telepharmacy"[tw] OR "teleradiology"[tw] OR "telerehabilitation"[tw] OR "video call"[tw] OR "video calls"[tw] OR "virtual consult"[tw] OR "virtual consultation"[tw] OR "virtual consultations"[tw] OR "virtual consults"[tw] OR "virtual medicine"[tw])

AND

("systematic review"[pt] OR "meta-analysis"[pt] OR "review"[pt] OR "systemati\*"[ti] OR "integrative review"[ti] OR "rapid review" [ti] OR "umbrella review"[ti] OR "scoping review"[ti] OR "narrative review"[ti] OR "literature review"[ti] OR "evidence based review"[ti] OR "meta analysis"[ti] OR "metaanalysis"[ti])

## Embase (Ovid)

(afghanistan OR albania OR algeria OR american samoa OR angola OR "antigua and barbuda" OR antigua OR barbuda OR argentina OR armenia OR armenian OR aruba OR azerbaijan OR bahrain OR bangladesh OR barbados OR republic of belarus OR belarus OR byelarus OR belorussia OR byelorussian OR belize OR british honduras OR benin OR dahomey OR bhutan OR bolivia OR "bosnia and herzegovina" OR bosnia OR herzegovina OR botswana OR bechuanaland OR brazil OR brasil OR bulgaria OR burkina faso OR burkina fasso OR upper volta OR burundi OR urundi OR cabo verde OR cape verde OR cambodia OR kampuchea OR khmer republic OR cameroon OR cameron OR cameroun OR central african republic OR ubangi shari OR chad OR chile OR china OR colombia OR comoros OR comoro islands OR iles comores OR mayotte OR democratic republic of the congo OR democratic republic congo OR congo OR zaire OR costa rica OR "cote d'ivoire" OR "cote d'ivoire" OR cote divoire OR cote d ivoire OR ivory coast OR croatia OR cuba OR cyprus OR czech republic OR czechoslovakia OR djibouti OR french somaliland OR dominica OR dominican republic OR ecuador OR egypt OR united arab republic OR el salvador OR equatorial guinea OR spanish guinea OR eritrea OR estonia OR eswatini OR swaziland OR ethiopia OR fiji OR gabon OR gabonese republic OR gambia OR "georgia (republic)" OR georgian OR ghana OR gold coast OR gibraltar OR greece OR grenada OR guam OR guatemala OR guinea OR guinea bissau OR guyana OR british guiana OR haiti OR hispaniola OR honduras OR hungary OR india OR indonesia OR timor OR iran OR iraq OR isle of man OR jamaica OR jordan OR kazakhstan OR kazakh OR kenya OR "democratic people's republic of korea" OR republic of korea OR north korea OR south korea OR korea OR kosovo OR kyrgyzstan OR kirghizia OR kirgizstan OR kyrgyz republic OR kirghiz OR laos OR lao pdr OR "lao people's democratic republic" OR latvia OR lebanon OR lebanese republic OR lesotho OR basutoland OR liberia OR libya OR libyan arab jamahiriya OR lithuania OR macau OR macao OR republic of north macedonia OR macedonia OR madagascar OR malagasy republic OR malawi OR nyasaland OR malaysia OR malay federation OR malaya federation OR maldives OR indian ocean islands OR indian ocean OR mali OR malta OR micronesia OR federated

states of micronesia OR kiribati OR marshall islands OR nauru OR northern mariana islands OR palau OR tuvalu OR mauritania OR mauritius OR mexico OR moldova OR moldovan OR mongolia OR montenegro OR "montenegro (republic)" OR morocco OR ifni OR mozambique OR portuguese east africa OR myanmar OR burma OR namibia OR nepal OR netherlands antilles OR nicaragua OR niger OR nigeria OR oman OR muscat OR pakistan OR panama OR papua new guinea OR new guinea OR paraguay OR peru OR philippines OR philipines OR phillipines OR phillippines OR poland OR "polish people's republic" OR portugal OR portuguese republic OR puerto rico OR romania OR russia OR russian federation OR ussr OR soviet union OR union of soviet socialist republics OR rwanda OR ruanda OR samoa OR pacific islands OR polynesia OR samoan islands OR navigator island OR navigator islands OR "sao tome and principe" OR saudi arabia OR senegal OR serbia OR seychelles OR sierra leone OR slovakia OR slovak republic OR slovenia OR melanesia OR solomon island OR solomon islands OR norfolk island OR norfolk islands OR somalia OR south africa OR south sudan OR sri lanka OR ceylon OR "saint kitts and nevis" OR "st. kitts and nevis" OR saint lucia OR "st. lucia" OR "saint vincent and the grenadines" OR saint vincent OR "st. vincent" OR grenadines OR sudan OR suriname OR surinam OR dutch guiana OR netherlands guiana OR syria OR syrian arab republic OR tajikistan OR tadjikistan OR tadzhikistan OR tadjik OR tanzania OR tanganyika OR thailand OR siam OR timor leste OR east timor OR togo OR togolese republic OR tonga OR "trinidad and tobago" OR trinidad OR tobago OR tunisia OR "turkey (republic)" OR turkey OR turkmenistan OR turkmen OR uganda OR ukraine OR uruguay OR uzbekistan OR uzbek OR vanuatu OR new hebrides OR venezuela OR vietnam OR viet nam OR middle east OR west bank OR gaza OR palestine OR yemen OR yugoslavia OR zambia OR zimbabwe OR northern rhodesia OR global south OR africa south of the sahara OR "sub saharan africa" OR subsaharan africa OR africa, central OR central africa OR africa, northern OR north africa OR northern africa OR magreb OR maghrib OR sahara OR africa, southern OR southern africa OR africa, eastern OR east africa OR eastern africa OR africa, western OR west africa OR western africa OR west indies OR indian ocean islands OR caribbean region OR caribbean islands OR caribbean OR central america OR latin america OR "south and central america" OR south america OR asia, central OR central asia OR asia, northern OR north asia OR northern asia OR asia, southeastern OR southeastern asia OR south eastern asia OR southeast asia OR south east asia OR asia, western OR western asia OR europe, eastern OR east europe OR eastern europe OR developing country OR developing countries OR developing nation? OR developing population? OR developing world OR less developed countr\* OR less developed nation? OR less developed population? OR less developed world OR lesser developed countr\* OR lesser developed nation? OR lesser developed population? OR lesser developed world OR under developed countr\* OR under developed nation? OR under developed population? OR under developed world OR underdeveloped countr\* OR underdeveloped nation? OR underdeveloped population? OR underdeveloped world OR middle income countr\* OR middle income nation? OR middle income population? OR low income countr\* OR low income nation? OR low income population? OR lower income countr\* OR lower income nation? OR lower income population? OR underserved countr\* OR underserved nation? OR underserved population? OR underserved world OR under served countr\* OR under served nation? OR under served population? OR under served world OR deprived countr\* OR deprived nation? OR deprived population? OR deprived world OR poor countr\* OR poor nation? OR poor population? OR poor world OR poorer countr\* OR poorer nation? OR poorer population? OR poorer world OR developing econom\* OR less developed econom\* OR lesser developed econom\* OR under developed econom\* OR underdeveloped econom\* OR middle income econom\* OR low income econom\* OR lower income econom\* OR low gdp OR low gnp OR low gross domestic OR low gross national OR lower gdp OR lower gnp OR lower gross domestic OR lower gross national OR lmic OR lmic OR third world OR lami countr\* OR transitional countr\* OR emerging economies OR emerging nation?).ti,ab,sh,kw.



AND

(exp telemedicine/ or exp telehealth/ or exp telecare/ or exp telenursing/ or exp telediagnosis/ or exp telepathology/ or exp telepharmacy/ or exp telerehabilitation/ or exp teleradiology/ OR eHealth.ti,ab,kf. OR esanjeevani.ti,ab,kf. OR mHealth.ti,ab,kf. OR mobile health.ti,ab,kf. OR remote consultation.ti,ab,kf. OR remote consultations.ti,ab,kf. OR tele care.ti,ab,kf. OR tele consult.ti,ab,kf. OR tele consultation.ti,ab,kf. OR tele consultations.ti,ab,kf. OR tele consults.ti,ab,kf. OR tele diagnosis.ti,ab,kf. OR tele diagnostic.ti,ab,kf. OR tele diagnostics.ti,ab,kf. OR tele health.ti,ab,kf. OR tele medicine.ti,ab,kf. OR tele monitor?.ti,ab,kf. OR tele nursing.ti,ab,kf. OR tele pathology.ti,ab,kf. OR tele pharmacy.ti,ab,kf. OR tele radiology.ti,ab,kf. OR tele rehab.ti,ab,kf. OR tele rehabilitation.ti,ab,kf. OR telecare.ti,ab,kf. OR teleconsult.ti,ab,kf. OR teleconsultation.ti,ab,kf. OR teleconsultations.ti,ab,kf. OR teleconsults.ti,ab,kf. OR telediagnosis.ti,ab,kf. OR telediagnostic.ti,ab,kf. OR telediagnosics.ti,ab,kf. OR telehealth.ti,ab,kf. OR telemedicine.ti,ab,kf. OR telemonitor?.ti,ab,kf. OR telenursing.ti,ab,kf. OR telepathology.ti,ab,kf. OR telepharmacy.ti,ab,kf. OR teleradiology.ti,ab,kf. OR telerehabilitation.ti,ab,kf. OR virtual consult.ti,ab,kf. OR virtual consultation.ti,ab,kf. OR virtual consultations.ti,ab,kf. OR virtual consults.ti,ab,kf. OR virtual medicine.ti,ab,kf.)

AND

(systemati\* or review or scoping or integrative or rapid or narrative or metaanalysis or meta-analysis or umbrella).ti,sh.

## Cochrane Library (Wiley)

(([mh "telemedicine"] OR [mh "remote consultation"] OR [mh "telenursing"] OR [mh "telepathology"] OR [mh "teleradiology"] OR [mh "telerehabilitation"] OR eHealth.ti,ab,kw OR esanjeevani.ti,ab,kw OR mHealth.ti,ab,kw OR mobile health.ti,ab,kw OR remote consultation.ti,ab,kw OR remote consultations.ti,ab,kw OR tele care.ti,ab,kw OR tele consult.ti,ab,kw OR tele consultation.ti,ab,kw OR tele consultations.ti,ab,kw OR tele consults.ti,ab,kw OR tele diagnosis.ti,ab,kw OR tele diagnostic.ti,ab,kw OR tele diagnostics.ti,ab,kw OR tele health.ti,ab,kw OR tele medicine.ti,ab,kw OR tele monitor\*.ti,ab,kw OR tele nursing.ti,ab,kw OR tele pathology.ti,ab,kw OR tele pharmacy.ti,ab,kw OR tele radiology.ti,ab,kw OR tele rehab.ti,ab,kw OR tele rehabilitation.ti,ab,kw OR telecare.ti,ab,kw OR teleconsult.ti,ab,kw OR teleconsultation.ti,ab,kw OR teleconsultations.ti,ab,kw OR teleconsults.ti,ab,kw OR telediagnosis.ti,ab,kw OR telediagnostic.ti,ab,kw OR telediagnosics.ti,ab,kw OR telehealth.ti,ab,kw OR telemedicine.ti,ab,kw OR telemonitor\*.ti,ab,kw OR telenursing.ti,ab,kw OR telepathology.ti,ab,kw OR telepharmacy.ti,ab,kw OR teleradiology.ti,ab,kw OR telerehabilitation.ti,ab,kw OR "video call".ti,ab,kw OR "video calls".ti,ab,kw OR virtual consult.ti,ab,kw OR virtual consultation.ti,ab,kw OR virtual consultations.ti,ab,kw OR virtual consults.ti,ab,kw OR virtual medicine.ti,ab,kw)

AND

(systemati\* OR review OR scoping OR integrative OR rapid OR narrative OR metaanalysis OR meta-analysis OR umbrella):ti

## WHO Global Index Medicus

("eHealth" OR "esanjeevani" OR "mHealth" OR "mobile health" OR "remote consultation" OR "remote consultations" OR "tele care" OR "tele consult" OR "tele consultation" OR "tele consultations" OR "tele consults" OR "tele diagnosis" OR "tele diagnostic " OR "tele diagnostics" OR "tele health" OR "tele medicine" OR "tele monitor" OR "telemonitoring" OR "tele monitoring" OR "tele nursing" OR "tele pathology" OR "tele pharmacy" OR "tele radiology" OR "tele rehab" OR "tele rehabilitation" OR "telecare" OR "teleconsult" OR "teleconsultation" OR "teleconsultations" OR "teleconsults" OR "telediagnosis" OR "telediagnostic" OR "telediagnosics" OR "telehealth" OR "telemedicine" OR "telemonitor\*" OR "telenursing" OR "telepathology" OR "telepharmacy" OR "teleradiology" OR "telerehabilitation" OR "video call" OR "video calls" OR "virtual consult" OR "virtual consultation" OR "virtual consultations" OR "virtual consults" OR "virtual medicine")

AND

(systemati\* OR review OR scoping OR integrative OR rapid OR narrative OR metaanalysis OR meta-analysis OR umbrella)

## Scopus (Elsevier)

TITLE-ABS("afghanistan" OR "albania" OR "algeria" OR "american samoa" OR "angola" OR "antigua" OR "antigua" OR "barbuda" OR "argentina" OR "armenia" OR "armenian" OR "aruba" OR "azerbaijan" OR "bahrain" OR "bangladesh" OR "barbados" OR "belarus" OR "byelarus" OR "belorussia" OR "byelorussian" OR "belize" OR "british honduras" OR "benin" OR "dahomey" OR "bhutan" OR "bolivia" OR "bosnia" OR "bosnia" OR "herzegovina" OR "botswana" OR "bechuanaland" OR "brazil" OR "brasil" OR "bulgaria" OR "burkina faso" OR "burkina fasso" OR "upper volta" OR "burundi" OR "urundi" OR "cabo verde" OR "cape verde" OR "cambodia" OR "kampuchea" OR "khmer republic" OR "cameroon" OR "cameron" OR "cameroun" OR "central african republic" OR "ubangi shari" OR "chad" OR "chile" OR "china" OR "colombia" OR "comoros" OR "comoro islands" OR "iles comores" OR "mayotte" OR "congo" OR "democratic republic congo" OR "congo" OR "zaire" OR "costa rica" OR "cote d'ivoire" OR "cote d ivoire" OR "cote divoire" OR "cote d ivoire" OR "ivory coast" OR "croatia" OR "cuba" OR "cyprus" OR "czech republic" OR "czechoslovakia" OR "djibouti" OR "french somaliland" OR "dominica" OR "dominican republic" OR "ecuador" OR "egypt" OR "united arab republic" OR "el salvador" OR "equatorial guinea" OR "spanish guinea" OR "eritrea" OR "estonia" OR "eswatini" OR "swaziland" OR "ethiopia" OR "fiji" OR "gabon" OR "gabonese republic" OR "gambia" OR "georgia" OR "georgian" OR "ghana" OR "gold coast" OR "gibraltar" OR "greece" OR "grenada" OR "guam" OR "guatemala" OR "guinea" OR "guinea bissau" OR "guyana" OR "british guiana" OR "haiti" OR "hispaniola" OR "honduras" OR "hungary" OR "india" OR "indonesia" OR "timor" OR "iran" OR "iraq" OR "jamaica" OR "jordan" OR "kazakhstan" OR "kazakh" OR "kenya" OR "korea" OR "north korea" OR "south korea" OR "korea" OR "kosovo" OR "kyrgyzstan" OR "kirghizia" OR "kirgizstan" OR "kyrgyz republic" OR "kirghiz" OR "laos" OR "lao pdr" OR "lao people's democratic republic" OR "latvia" OR "lebanon" OR "lebanese republic" OR "lesotho" OR "basutoland" OR "liberia" OR "libya" OR "libyan arab jamahiriya" OR "lithuania" OR "macau" OR "macao" OR "north macedonia" OR "macedonia" OR "madagascar" OR "malagasy republic" OR "malawi" OR "nyasaland" OR "malaysia" OR "malay federation" OR "malaya federation" OR "maldives" OR "indian ocean islands" OR "indian ocean" OR "mali" OR "malta" OR "micronesia" OR "micronesia" OR "kiribati" OR "marshall islands" OR "nauru" OR "northern mariana islands" OR "palau" OR "tuvalu" OR "mauritania" OR "mauritius" OR "mexico" OR "moldova" OR "moldovian" OR "mongolia" OR "montenegro" OR "morocco" OR "ifni" OR



"mozambique" OR "portuguese east africa" OR "myanmar" OR "burma" OR "namibia" OR "nepal" OR "netherlands antilles" OR "nicaragua" OR "niger" OR "nigeria" OR "oman" OR "muscat" OR "pakistan" OR "panama" OR "papua new guinea" OR "new guinea" OR "paraguay" OR "peru" OR "philippines" OR "philipines" OR "phillipines" OR "phillippines" OR "poland" OR "polish people's republic" OR "portugal" OR "portuguese republic" OR "puerto rico" OR "romania" OR "russia" OR "russian federation" OR "ussr" OR "soviet union" OR "rwanda" OR "ruanda" OR "samoa" OR "pacific islands" OR "polynesia" OR "samoan islands" OR "navigator island" OR "navigator islands" OR "sao tome" OR "saudi arabia" OR "senegal" OR "serbia" OR "seychelles" OR "sierra leone" OR "slovakia" OR "slovak republic" OR "slovenia" OR "melanesia" OR "solomon island" OR "solomon islands" OR "norfolk island" OR "norfolk islands" OR "somalia" OR "south africa" OR "south sudan" OR "sri lanka" OR "ceylon" OR "saint kitts" OR "st kitts" OR "saint lucia" OR "st lucia" OR "saint vincent" OR "st vincent" OR "grenadines" OR "sudan" OR "suriname" OR "surinam" OR "dutch guiana" OR "netherlands guiana" OR "syria" OR "syrian arab republic" OR "tajikistan" OR "tadjikistan" OR "tadzhikistan" OR "tadzhik" OR "tanzania" OR "tanganyika" OR "thailand" OR "siam" OR "timor leste" OR "east timor" OR "togo" OR "togolese republic" OR "tonga" OR "trinidad and tobago" OR "trinidad" OR "tobago" OR "tunisia" OR "turkey" OR "turkmenistan" OR "turkmen" OR "uganda" OR "ukraine" OR "uruguay" OR "uzbekistan" OR "uzbek" OR "vanuatu" OR "new hebrides" OR "venezuela" OR "vietnam" OR "viet nam" OR "middle east" OR "west bank" OR "gaza" OR "palestine" OR "yemen" OR "yugoslavia" OR "zambia" OR "zimbabwe" OR "northern rhodesia" OR "global south" OR "africa south of the sahara" OR "sub saharan africa" OR "subsaharan africa" OR "central africa" OR "north africa" OR "northern africa" OR "magreb" OR "maghrib" OR "sahara" OR "southern africa" OR "east africa" OR "eastern africa" OR "west africa" OR "western africa" OR "west indies" OR "indian ocean islands" OR "caribbean region" OR "caribbean islands" OR "caribbean" OR "central america" OR "latin america" OR "south and central america" OR "south america" OR "asia, central" OR "central asia" OR "north asia" OR "northern asia" OR "southeastern asia" OR "south eastern asia" OR "southeast asia" OR "south east asia" OR "western asia" OR "east europe" OR "eastern europe" OR "developing country" OR "developing countries" OR "developing nation\*" OR "developing population\*" OR "developing world" OR "less developed countr\*" OR "less developed nation\*" OR "less developed population\*" OR "less developed world" OR "lesser developed countr\*" OR "lesser developed nation\*" OR "lesser developed population\*" OR "lesser developed world" OR "under developed countr\*" OR "under developed nation\*" OR "under developed population\*" OR "under developed world" OR "underdeveloped countr\*" OR "underdeveloped nation\*" OR "underdeveloped population\*" OR "underdeveloped world" OR "middle income countr\*" OR "middle income nation\*" OR "middle income population\*" OR "low income countr\*" OR "low income nation\*" OR "low income population\*" OR "lower income countr\*" OR "lower income nation\*" OR "lower income population\*" OR "underserved countr\*" OR "underserved nation\*" OR "underserved population\*" OR "underserved world" OR "under served countr\*" OR "under served nation\*" OR "under served population\*" OR "under served world" OR "deprived countr\*" OR "deprived nation\*" OR "deprived population\*" OR "deprived world" OR "poor countr\*" OR "poor nation\*" OR "poor population\*" OR "poor world" OR "poorer countr\*" OR "poorer nation\*" OR "poorer population\*" OR "poorer world" OR "developing econom\*" OR "less developed econom\*" OR "lesser developed econom\*" OR "under developed econom\*" OR "underdeveloped econom\*" OR "middle income econom\*" OR "low income econom\*" OR "lower income econom\*" OR "low gdp" OR "low gnp" OR "low gross domestic" OR "low gross national" OR "lower gdp" OR "lower gnp" OR "lower gross domestic" OR "lower gross national" OR "lami" OR "lamic" OR "lamic" OR "third world" OR "lami countr\*" OR "transitional countr\*" OR "emerging economies" OR "emerging nation\*")

AND

TITLE-ABS-KEY("eHealth" OR "esanjeevani" OR "mHealth" OR "mobile health" OR "remote consultation" OR "remote consultations" OR "tele care" OR "tele consult" OR "tele consultation" OR "tele consultations" OR "tele consults" OR "tele diagnosis" OR "tele diagnostic " OR "tele diagnostics" OR "tele health" OR "tele medicine" OR "tele monitor" OR "telemonitoring" OR "tele monitoring" OR "tele nursing" OR "tele pathology" OR "tele pharmacy" OR "tele radiology" OR "tele rehab" OR "tele rehabilitation" OR "telecare" OR "teleconsult" OR "teleconsultation" OR "teleconsultations" OR "teleconsults" OR "telediagnosis" OR "telediagnostic" OR "telediagnosics" OR "telehealth" OR "telemedicine" OR "telemonitor\*" OR "telenursing" OR "telepathology" OR "telepharmacy" OR "teleradiology" OR "telerehabilitation" OR "video call" OR "video calls" OR "virtual consult" OR "virtual consultation" OR "virtual consultations" OR "virtual consults" OR "virtual medicine")

AND

TITLE(systemati\* OR review OR scoping OR integrative OR rapid OR narrative OR metaanalysis OR meta-analysis OR umbrella)

**Supplementary File 2: List of Excluded articles at the full text stage (N=35)**

| S.no | Title                                                                                                                                            | Reason for exclusion         |
|------|--------------------------------------------------------------------------------------------------------------------------------------------------|------------------------------|
| 1.   | Telemedicine and e-Health research solutions in literature for combatting COVID-19: a systematic review                                          | No outcome                   |
| 2.   | Factors influencing health managers' acceptance of eHealth services in Saudi Arabia                                                              | Wrong study design           |
| 3.   | Promotors and barriers to implementation of assistive-technology and telecare for people with dementia and their caregivers: A systematic review | Full text not available      |
| 4.   | Tele-Ultrasound in Resource-Limited Settings: A Systematic Review                                                                                | No outcome                   |
| 5.   | Asynchronous teleneurology: A systematic review of electronic provider-to-provider communications                                                | Full text not available      |
| 6.   | Enablers of telemedicine technology adoption: A case-based conceptualization in Indian context                                                   | Full text not available      |
| 7.   | Is telemedicine best alternative to reaching last mile: Investigation in the context of rural india                                              | Full text not available      |
| 8.   | Telemedicine to deliver diabetes care in low-and middle-income countries: A systematic review and meta-analysis                                  | No outcome                   |
| 9.   | Telehealth Use in Geriatrics Care during the COVID-19 Pandemic-A Scoping Review and Evidence Synthesis                                           | Data Not available for LMICs |
| 10.  | Teletherapy Versus In-Person Psychotherapy for Depression: A Meta-Analysis of Randomized Controlled Trials                                       | Full text not available      |
| 11.  | Teleophthalmology and its evolving role in a COVID-19 pandemic: A scoping review                                                                 | Data Not available for LMICs |
| 12.  | Telemedicine application in the care of acute myocardial infarction patients: Systematic review and meta-analysis                                | Wrong study design           |
| 13.  | Teledentistry: A systematic review of the literature                                                                                             | No outcome                   |
| 14.  | Non-adherence to telemedicine interventions for drug users: systematic review                                                                    | No outcome                   |
| 15.  | Telesurgery presence in low and middle income settings: A systematic review                                                                      | Wrong study design           |
| 16.  | The role of telehealth physical therapy in stroke: A systematic review                                                                           | Full text not available      |
| 17.  | Telehealth and Telemedicine in Response to Critical Coronavirus: A Systematic Review                                                             | Data Not available for LMICs |
| 18.  | Telemental Health Use in the COVID-19 Pandemic: A Scoping Review and Evidence Gap Mapping                                                        | Data Not available for LMICs |

|     |                                                                                                                                                                           |                              |
|-----|---------------------------------------------------------------------------------------------------------------------------------------------------------------------------|------------------------------|
| 19. | Telemental health in low- And middle-income countries: A systematic review                                                                                                | No outcome                   |
| 20. | Advances in obstetric telemonitoring: a systematic review                                                                                                                 | No outcome                   |
| 21. | Systematic review on what works, what does not work and why of implementation of mobile health (mHealth) projects in Africa                                               | No intervention              |
| 22. | Cost-effectiveness of diabetic retinopathy screening programs using telemedicine: A systematic review                                                                     | No outcome                   |
| 23. | Current status and future directions of mhealth interventions for health system strengthening in India: Systematic review                                                 | No outcome                   |
| 24. | Use of telehealth during the COVID-19 pandemic: Scoping review                                                                                                            | No outcome                   |
| 25. | Teleoncology in sub-Saharan Africa: A literature review                                                                                                                   | No outcome                   |
| 26. | Telehealth-Based Services During the COVID-19 Pandemic: A Systematic Review of Features and Challenges                                                                    | Population                   |
| 27. | The promise of telemedicine in Pakistan: A systematic review                                                                                                              | No outcome                   |
| 28. | Usability of Telemedicine in Physical Therapy Rehabilitation: Systematic review                                                                                           | Wrong study design           |
| 29. | Use of telehealth in home nutrition support: Challenges and advantages                                                                                                    | Wrong study design           |
| 30. | Needs, gaps and opportunities for standard and e-mental health care among at-risk populations in the Asia Pacific in the context of COVID-19: a rapid scoping review      | No outcome                   |
| 31. | Telemedicine in Southeast Asia: A Systematic Review                                                                                                                       | Full text not available      |
| 32. | Telemedicine across borders: A systematic review of factors that hinder or support implementation                                                                         | Data Not available for LMICs |
| 33. | Role of telehealth in diabetic foot ulcer management - A systematic review                                                                                                | Population                   |
| 34. | Implementation barriers for mHealth for non-communicable diseases management in low and middle income countries: A scoping review and field-based views from implementers | No intervention              |
| 35. | Enablers and barriers in providing telediabetes services for Indigenous communities: A systematic review                                                                  | No intervention              |

**Supplemental file 3: PRIOR checklist (preferred reporting items for overviews of reviews)**

| Section topic        | Item No | Item                                                                                                                                                              | Location where item is reported |
|----------------------|---------|-------------------------------------------------------------------------------------------------------------------------------------------------------------------|---------------------------------|
| <b>Title</b>         |         |                                                                                                                                                                   |                                 |
| Title                | 1       | Identify the report as an overview of reviews.                                                                                                                    | 1                               |
| <b>Abstract</b>      |         |                                                                                                                                                                   |                                 |
| Abstract             | 2       | Provide a comprehensive and accurate summary of the purpose, methods, and results of the overview of reviews.                                                     | 2                               |
| <b>Introduction</b>  |         |                                                                                                                                                                   |                                 |
| Rationale            | 3       | Describe the rationale for conducting the overview of reviews in the context of existing knowledge.                                                               | 5                               |
| Objectives           | 4       | Provide an explicit statement of the objective(s) or question(s) addressed by the overview of reviews.                                                            | 5                               |
| <b>Methods</b>       |         |                                                                                                                                                                   |                                 |
| Eligibility criteria | 5a      | Specify the inclusion and exclusion criteria for the overview of reviews. If supplemental primary studies were included, this should be stated, with a rationale. | 6-7                             |
|                      | 5b      | Specify the definition of “systematic review” as used in the inclusion criteria for the overview of reviews.                                                      | NA                              |
| Information sources  | 6       | Specify all databases, registers, websites, organizations, reference                                                                                              | 7                               |

| Section topic           | Item No | Item                                                                                                                                                                                            | Location where item is reported |
|-------------------------|---------|-------------------------------------------------------------------------------------------------------------------------------------------------------------------------------------------------|---------------------------------|
|                         |         | lists, and other sources searched or consulted to identify systematic reviews and supplemental primary studies (if included). Specify the date when each source was last searched or consulted. |                                 |
| Search strategy         | 7       | Present the full search strategies for all databases, registers and websites, such that they could be reproduced. Describe any search filters and limits applied.                               | Provided in supplemental file 1 |
| Selection process       | 8a      | Describe the methods used to decide whether a systematic review or supplemental primary study (if included) met the inclusion criteria of the overview of reviews.                              | NA                              |
|                         | 8b      | Describe how overlap in the populations, interventions, comparators, and/or outcomes of systematic reviews was identified and managed during study selection.                                   | 6-7                             |
| Data collection process | 9a      | Describe the methods used to collect data from reports.                                                                                                                                         | NA                              |
|                         | 9b      | If applicable, describe the methods used to identify and manage primary study overlap at the level of the comparison and outcome during data collection. For each                               | NA                              |



| Section topic           | Item No | Item                                                                                                                                                                                                                                                                                           | Location where item is reported |
|-------------------------|---------|------------------------------------------------------------------------------------------------------------------------------------------------------------------------------------------------------------------------------------------------------------------------------------------------|---------------------------------|
|                         |         | outcome, specify the method used to illustrate and/or quantify the degree of primary study overlap across systematic reviews.                                                                                                                                                                  |                                 |
|                         | 9c      | If applicable, specify the methods used to manage discrepant data across systematic reviews during data collection.                                                                                                                                                                            | NA                              |
| Data items              | 10      | List and define all variables and outcomes for which data were sought. Describe any assumptions made and/or measures taken to identify and clarify missing or unclear information.                                                                                                             | 8                               |
| Risk of bias assessment | 11a     | Describe the methods used to assess risk of bias or methodological quality of the included systematic reviews.                                                                                                                                                                                 | NA                              |
|                         | 11b     | Describe the methods used to collect data on (from the systematic reviews) and/or assess the risk of bias of the primary studies included in the systematic reviews. Provide a justification for instances where flawed, incomplete, or missing assessments are identified but not reassessed. | NA                              |

| Section topic             | Item No | Item                                                                                                                                                                                                                                                                                                        | Location where item is reported |
|---------------------------|---------|-------------------------------------------------------------------------------------------------------------------------------------------------------------------------------------------------------------------------------------------------------------------------------------------------------------|---------------------------------|
|                           | 11c     | Describe the methods used to assess the risk of bias of supplemental primary studies (if included).                                                                                                                                                                                                         | NA                              |
| Synthesis methods         | 12a     | Describe the methods used to summarise or synthesise results and provide a rationale for the choice(s).                                                                                                                                                                                                     | 8                               |
|                           | 12b     | Describe any methods used to explore possible causes of heterogeneity among results.                                                                                                                                                                                                                        | NA                              |
|                           | 12c     | Describe any sensitivity analyses conducted to assess the robustness of the synthesised results.                                                                                                                                                                                                            | NA                              |
| Reporting bias assessment | 13      | Describe the methods used to collect data on (from the systematic reviews) and/<br><br>or assess the risk of bias due to missing results in a summary or synthesis (arising from reporting biases at the levels of the systematic reviews, primary studies, and supplemental primary studies, if included). | 8<br><br>NA                     |
| Certainty assessment      | 14      | Describe the methods used to collect data on (from the systematic reviews) and/or assess certainty (or confidence) in the body of evidence for an outcome.                                                                                                                                                  | NA                              |
| <b>Results</b>            |         |                                                                                                                                                                                                                                                                                                             |                                 |

| Section topic                                                                         | Item No | Item                                                                                                                                                                                                | Location where item is reported |
|---------------------------------------------------------------------------------------|---------|-----------------------------------------------------------------------------------------------------------------------------------------------------------------------------------------------------|---------------------------------|
| Systematic review and supplemental primary study selection                            | 15a     | Describe the results of the search and selection process, including the number of records screened, assessed for eligibility, and included in the overview of reviews, ideally with a flow diagram. | 8-9                             |
|                                                                                       | 15b     | Provide a list of studies that might appear to meet the inclusion criteria, but were excluded, with the main reason for exclusion.                                                                  | Supplemental file 2             |
| Characteristics of systematic reviews and supplemental primary studies                | 16      | Cite each included systematic review and supplemental primary study (if included) and present its characteristics.                                                                                  | 9 and Table 1                   |
| Primary study overlap                                                                 | 17      | Describe the extent of primary study overlap across the included systematic reviews.                                                                                                                | NA                              |
| Risk of bias in systematic reviews, primary studies, and supplemental primary studies | 18a     | Present assessments of risk of bias or methodological quality for each included systematic review.                                                                                                  | NA                              |
|                                                                                       | 18b     | Present assessments (collected from systematic reviews or assessed anew) of the risk of bias of the primary studies included in the systematic reviews.                                             | NA                              |
|                                                                                       | 18c     | Present assessments of the risk of bias of                                                                                                                                                          | NA                              |

| Section topic                   | Item No | Item                                                                                                                                                                                                                                                                                                                        | Location where item is reported |
|---------------------------------|---------|-----------------------------------------------------------------------------------------------------------------------------------------------------------------------------------------------------------------------------------------------------------------------------------------------------------------------------|---------------------------------|
|                                 |         | supplemental primary studies (if included).                                                                                                                                                                                                                                                                                 |                                 |
| Summary or synthesis of results | 19a     | For all outcomes, summarise the evidence from the systematic reviews and supplemental primary studies (if included). If meta-analyses were done, present for each the summary estimate and its precision and measures of statistical heterogeneity. If comparing groups, describe the direction of the effect.              | 10-13                           |
|                                 | 19b     | If meta-analyses were done, present results of all investigations of possible causes of heterogeneity.                                                                                                                                                                                                                      | NA                              |
|                                 | 19c     | If meta-analyses were done, present results of all sensitivity analyses conducted to assess the robustness of synthesised results.                                                                                                                                                                                          | NA                              |
| Reporting biases                | 20      | Present assessments (collected from systematic reviews and/or assessed anew) of the risk of bias due to missing primary studies, analyses, or results in a summary or synthesis (arising from reporting biases at the levels of the systematic reviews, primary studies, and supplemental primary studies, if included) for | NA                              |

| Section topic         | Item No | Item                                                                                                                                                                                                                                         | Location where item is reported |
|-----------------------|---------|----------------------------------------------------------------------------------------------------------------------------------------------------------------------------------------------------------------------------------------------|---------------------------------|
|                       |         | each summary or synthesis assessed.                                                                                                                                                                                                          |                                 |
| Certainty of evidence | 21      | Present assessments (collected or assessed anew) of certainty (or confidence) in the body of evidence for each outcome.                                                                                                                      | NA                              |
| <b>Discussion</b>     |         |                                                                                                                                                                                                                                              |                                 |
| Discussion            | 22a     | Summarise the main findings, including any discrepancies in findings across the included systematic reviews and supplemental primary studies (if included).                                                                                  | NA                              |
|                       | 22b     | Provide a general interpretation of the results in the context of other evidence.                                                                                                                                                            | 13-14                           |
|                       | 22c     | Discuss any limitations of the evidence from systematic reviews, their primary studies, and supplemental primary studies (if included) included in the overview of reviews. Discuss any limitations of the overview of reviews methods used. | 16                              |
|                       | 22d     | Discuss implications for practice, policy, and future research (both systematic reviews and primary research). Consider the relevance of the findings to the end users of the overview of reviews, eg, healthcare providers,                 | 13-16                           |

| Section topic             | Item No | Item                                                                                                                                                                         | Location where item is reported |
|---------------------------|---------|------------------------------------------------------------------------------------------------------------------------------------------------------------------------------|---------------------------------|
|                           |         | policymakers, patients, among others.                                                                                                                                        |                                 |
| <b>Other information</b>  |         |                                                                                                                                                                              |                                 |
| Registration and protocol | 23a     | Provide registration information for the overview of reviews, including register name and registration number, or state that the overview of reviews was not registered.     | 5                               |
|                           | 23b     | Indicate where the overview of reviews protocol can be accessed, or state that a protocol was not prepared.                                                                  | 5, Yes on PROSPERO              |
|                           | 23c     | Describe and explain any amendments to information provided at registration or in the protocol. Indicate the stage of the overview of reviews at which amendments were made. | NA                              |
| Support                   | 24      | Describe sources of financial or non-financial support for the overview of reviews, and the role of the funders or sponsors in the overview of reviews.                      | 16                              |
| Competing interests       | 25      | Declare any competing interests of the overview of reviews' authors.                                                                                                         | 16                              |
| Author information        | 26a     | Provide contact information for the corresponding author.                                                                                                                    | Title page                      |



| Section topic                            | Item No | Item                                                                                                                                                                                                                                                                                                         | Location where item is reported |
|------------------------------------------|---------|--------------------------------------------------------------------------------------------------------------------------------------------------------------------------------------------------------------------------------------------------------------------------------------------------------------|---------------------------------|
|                                          | 26b     | Describe the contributions of individual authors and identify the guarantor of the overview of reviews.                                                                                                                                                                                                      | 16                              |
| Availability of data and other materials | 27      | Report which of the following are available, where they can be found, and under which conditions they may be accessed: template data collection forms; data collected from included systematic reviews and supplemental primary studies; analytic code; any other materials used in the overview of reviews. | 16                              |
